# Supplementary material for: Highly sensitive microRNA detection by a duplex-specific nuclease amplification triggered three-dimensional DNA machine
Source: Royal Society of Chemistry journal article supplement (doi:10.1039/d1ay01709h), 2021-01-01
Supplement: d1ay01709h1.pdf [file d1ay01709h1.pdf]

**Supplementary Information For**

**Highly sensitive microRNA detection by duplex-specific nuclease  
amplification triggered three-dimensional DNA machine**

Chaohui Chen,<sup>\*a</sup> Rongxiang He,<sup>a</sup> Xiaoyun Liu,<sup>a</sup> Zhengtao Zhang<sup>a</sup> and Long Chen<sup>\*b</sup>

<sup>a</sup> *Key Laboratory of Optoelectronic Chemical Materials and Devices of Ministry of Education,  
College of Photoelectric Materials and Technology, Jiangnan University, Wuhan 430056, PR China*

<sup>b</sup> *Department of Respiratory and Critical Care Medicine, Key Laboratory of Pulmonary Diseases  
of Health Ministry, Union Hospital, Tongji Medical College, Huazhong University of Science and  
Technology, Wuhan 430056, PR China*

*\* Corresponding author.*

*E-mail addresses: [chaohui20071220@163.com](mailto:chaohui20071220@163.com); [lc0118@hust.edu.cn](mailto:lc0118@hust.edu.cn) (L. Chen)*

## Calculation of the surface coverage of F-DNA on AuNPs

The fluorescence intensity calibration curves of F-DNA were shown in Figure S2

Fluorescence intensity of F-DNA in the supernatant: 3078

Moles of F-DNA immobilized on AuNPs:  $(3078 - 128.6)/618.6 \times 10^{-8} \times 300 \times 10^{-6} = 1.43 \times 10^{-11}$   
mol

Moles of AuNPs:  $6.88 \times 10^{-9} \times 20 \times 10^{-6} = 1.38 \times 10^{-13}$  mol

Coverage of F-DNA on AuNPs:  $1.43 \times 10^{-11}/1.38 \times 10^{-13} = 103.6$

**Table S1** Sequence information for oligonucleotides used in this work

| Oligonucleotides    | Sequence (from 5' to 3')                                                             |
|---------------------|--------------------------------------------------------------------------------------|
| SH-DNA              | SH-TTTTTTTTTTGTGCTGAGGTT-FAM                                                         |
| F-biotin-DNA        | Biotin-TTTTTTTTTTCAACATCAGTCTGATAAGCTAACCTCAGCACTTTTT<br>TTTTTTTTTTTTAACCTCAGCAC-FAM |
| Biotin-DNA          | Biotin-TTTTTTTTTTCAACATCAGTCTGATAAGCTAACCTCAGCACTTTTT<br>TTTTTTTTTTTTAACCTCAGCAC     |
| Bipedal walking DNA | AACCTCAGCACTTTTTTTTTTTTTTTTTTTTTAACCTCAGCAC                                          |
| miRNA 21            | UAGCUUAUCAGACUGAUGUUGA                                                               |
| Let 7a              | UGAGGUAGUAGGUUGUAUAGUU                                                               |
| miRNA 199a          | ACAGUAGUCUGCACAUUGGUUA                                                               |
| miRNA 155           | UUA AUGCUAAUCGUGAUAGGGGU                                                             |
| miRNA 141           | UAACACUGUCUGGUAAGAUGG                                                                |

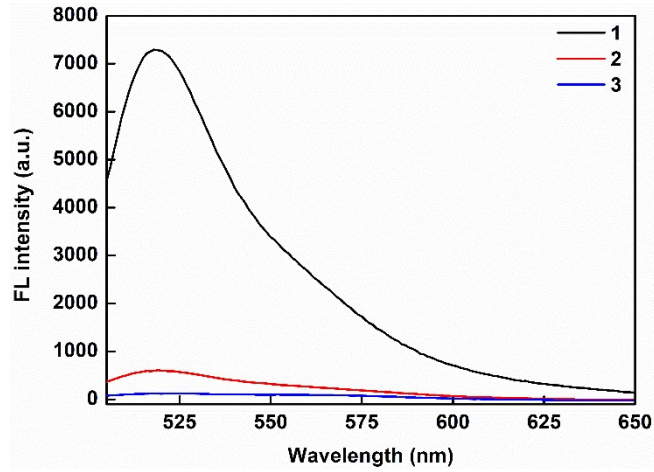

**Fig. S1** Fluorescence intensity of dissociated oligonucleotides after washing F-DNA-AuNPs at different times

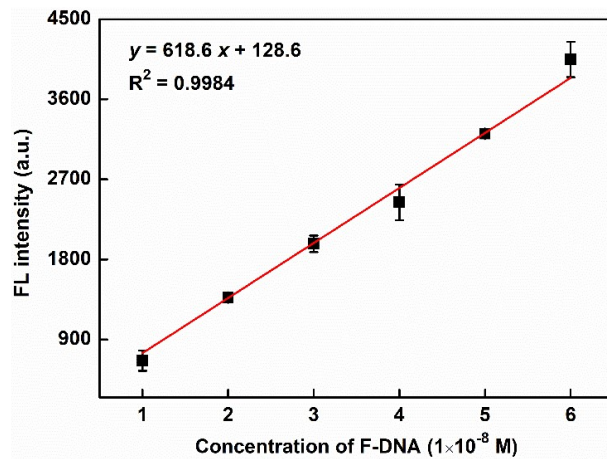

**Fig. S2** Fluorescence intensity calibration curve of standard F-DNA solution

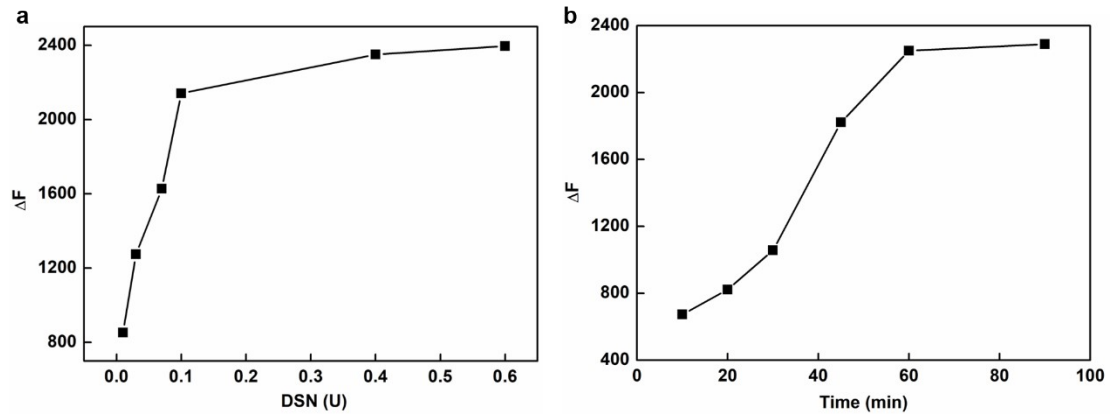

**Fig. S3** Effects of (a) the amount and (b) digestion time of DSN on the relative fluorescence intensity of this sensing system

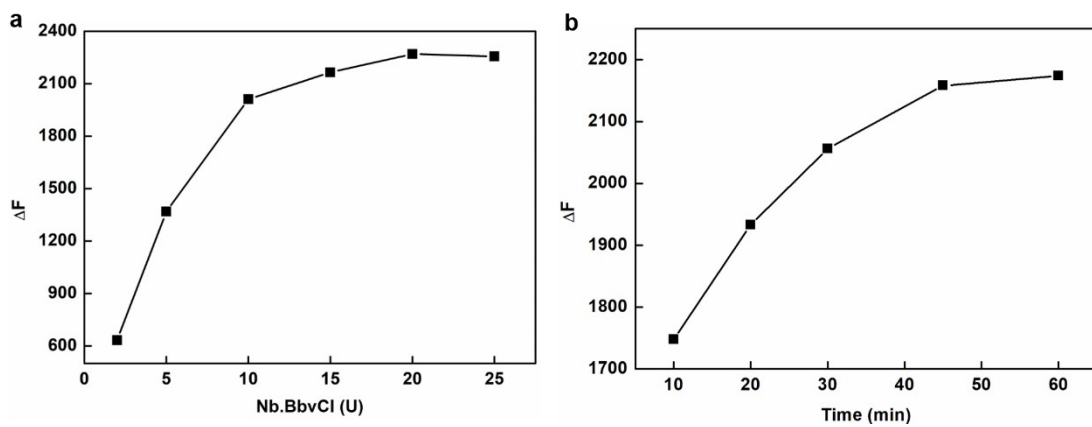

**Fig. S4** Effects of (a) the amount and (b) digestion time of Nb.BbvCI on the relative fluorescence intensity of this sensing system

**Table S2** Recovery of miRNA 21 in 1% human serum samples

| <b>Sample</b> | <b>Added (pM)</b> | <b>Founded (pM)</b> | <b>Recovery (%)</b> | <b>RSD (% , n = 3)</b> |
|---------------|-------------------|---------------------|---------------------|------------------------|
| 1             | 1                 | 0.97                | 97.0                | 3.72                   |
| 2             | 5                 | 4.53                | 90.6                | 2.21                   |
| 3             | 10                | 9.14                | 91.4                | 0.71                   |
